# Supplementary material
Source: Springer Nature journal article supplement (https://www.springermedizin.de/resource/supplementary/12971_2012_151_MOESM1_ESM.pdf/9595088)

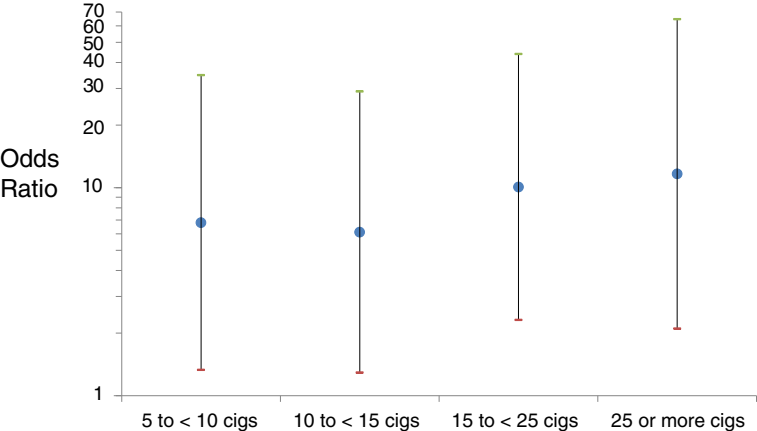

Supplement: MOESM1 [file 9595088]
